# Supplementary material
Source: publisher figshare collection journal article supplement (https://acs.figshare.com/ndownloader/files/4183309)
Supplement: Supplementary file 1 [file 4183309]

Supporting Information for:

## Organo-Modified Layered Double Hydroxides Switch-On Chemiluminescence

By Mengchun Zhang, Dongmei Han, Chao Lu\*, and Jin-Ming Lin

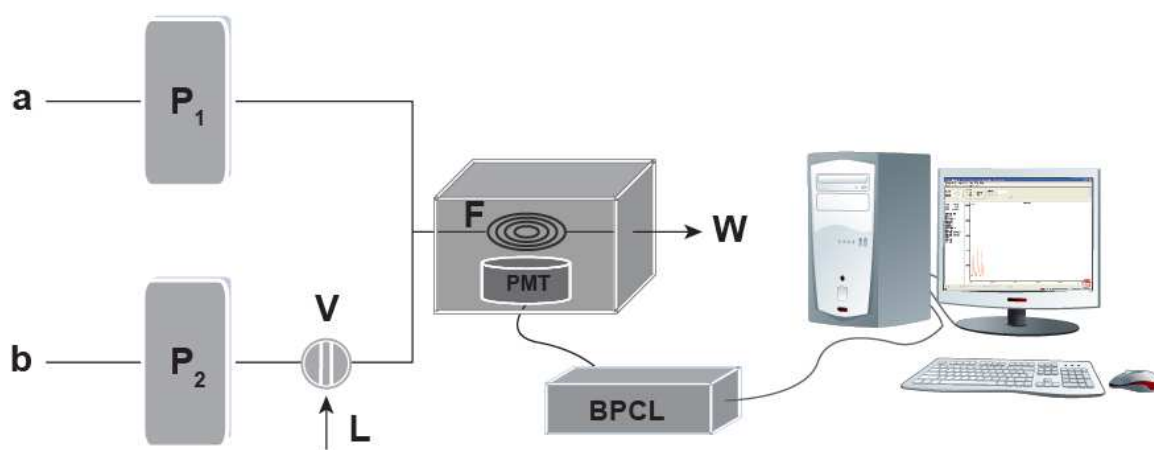

**Figure S1** Schematic diagram of the flow injection CL detection system. (a)  $H_2O_2$ ; (b)  $NaIO_4$ ; (L) Mg-Al LDHs; (V) six-way injection valve; (W) waste; ( $P_1$ ) and ( $P_2$ ) peristaltic pumps; (F) flow cell; (PMT) photomultiplier tube.

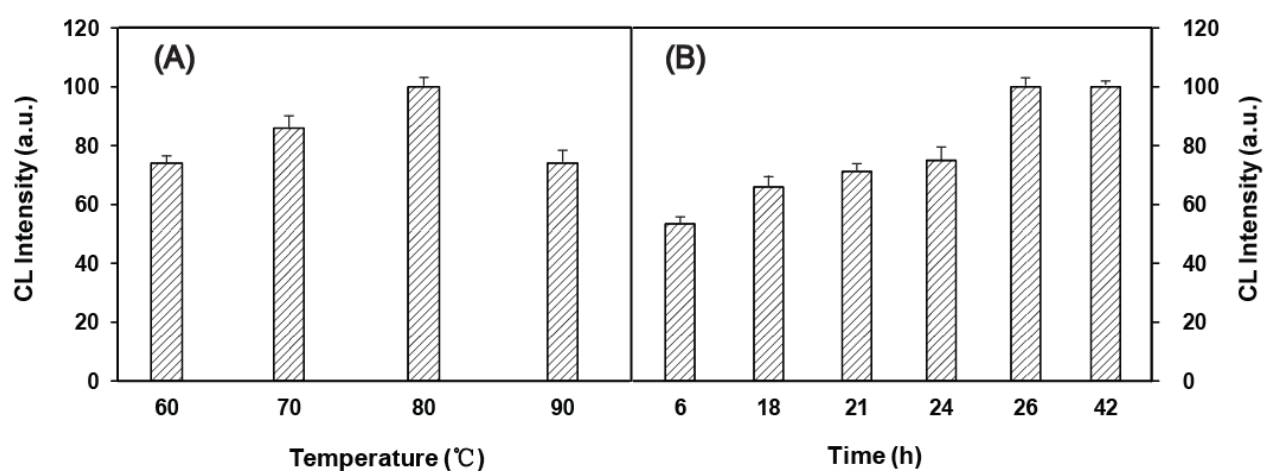

**Figure S2** Effects of the Mg-Al-SDBS LDHs synthesis conditions on the  $\text{IO}_4^-$ - $\text{H}_2\text{O}_2$  CL system. (A): Effect of reaction temperature; (B): Effect of the reaction time. Experimental conditions are same as in Fig. 1.

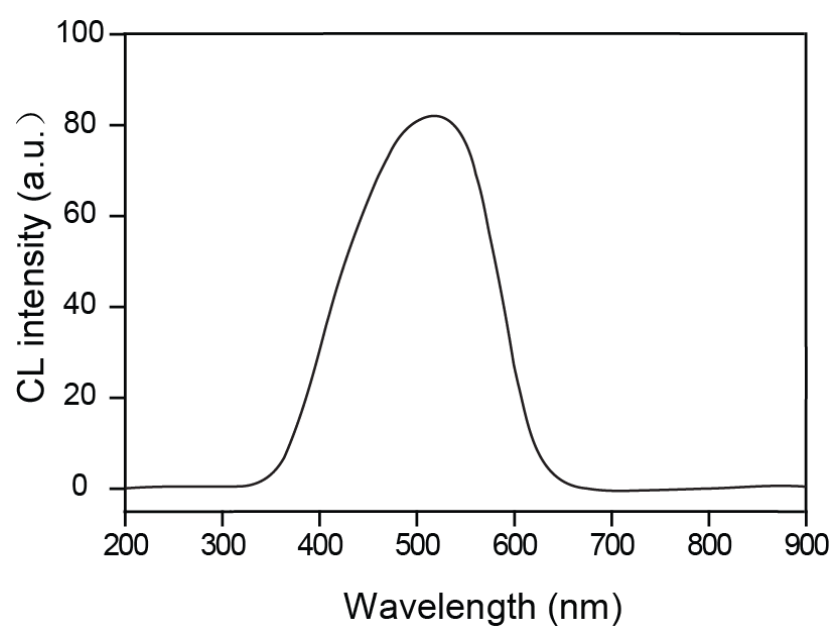

**Figure S3** CL spectrum for the  $\text{IO}_4^-$ - $\text{H}_2\text{O}_2$  system in the presence of Mg-Al-SDBS LDHs.
